# Supplementary material
Source: publisher site journal article supplement (https://www.dovepress.com/article/348834)
Supplement: Supplementary file 1 [file get_supplementary_file.php]

**APPENDIX 1. Summary of the NoSAS and STOP-Bang scores.**

**NoSAS score** (a score of ≥8 indicates a high probability of sleep apnea)

|  | **Points** |
| --- | --- |
| **N**eck circumference >40 cm | 4 |
| **O**besity |  |
| Body mass index 25 to <30 kg/m2 | 3 |
| Body mass index 30 kg/m2 | 5 |
| **S**noring | 2 |
| **A**ge >55 years | 4 |
| **S**ex: male | 2 |

**STOP-Bang score** (a patient is at high risk of having OSA if the total score is ≥3 of these items)

|  | **Points** |
| --- | --- |
| **S**noring | 1 |
| **T**ired | 1 |
| **O**bservations of apnea during sleep (by partner) | 1 |
| Blood **P**ressure elevated | 1 |
| **B**ody mass index >35 kg/m2 | 1 |
| **A**ge >50 years | 1 |
| **N**eck circumference >40 cm | 1 |
| **G**ender: male | 1 |
